# Supplementary material for: Nitrile hydroboration reactions catalysed by simple nickel salts, bis(acetylacetonato)nickel(ii) and its derivatives
Source: Royal Society of Chemistry journal article supplement (doi:10.1039/c7cy00944e), 2017-01-01
Supplement: c7cy00944e1.pdf [file c7cy00944e1.pdf]

Supporting Information for

**Nitrile hydroboration reactions catalysed by simple nickel salts,  
bis(acetylacetonato)nickel(II) and its derivatives**

Go Nakamura, Yumiko Nakajima,\* Kazuhiro Matsumoto, Venu Srinivas and  
Shigeru Shimada\*

*Interdisciplinary Research Centre for Catalytic Chemistry, National Institute of Advanced  
Industrial Science and Technology (AIST), Tsukuba Central 5, 1-1-1 Higashi, Tsukuba, Ibaraki  
305-8565, Japan*

E-mail address: yumiko-nakajima@aist.go.jp (Y. Nakajima), s-shimada@aist.go.jp (S.  
Shimada).

Contents

|                                                                                                                                  |     |
|----------------------------------------------------------------------------------------------------------------------------------|-----|
| Experimental details and compound characterization data.....                                                                     | S2  |
| <b>Figure 1.</b> Molecular structure of <i>t</i> BuCOCHC( <i>t</i> Bu)OBcat with 50% probability ellipsoids.<br>.....            | S19 |
| <b>Table S1.</b> Crystal data and details of the crystal structure determination for<br><i>t</i> BuCOCHC( <i>t</i> Bu)OBcat..... | S20 |
| References.....                                                                                                                  | S20 |

## Experimental Details and Compound Characterization Data

### General considerations

Unless otherwise noted, all manipulations were performed under a nitrogen atmosphere using Schlenk techniques or a glove box. Benzene, toluene, hexane, and THF were purified by a solvent purification system (MBraun SPS-800 or Glass Contour Ultimate Solvent System). Other solvents (1,2-dichloroethane, benzene-*d*<sub>6</sub>) were dried over CaH<sub>2</sub> or sodium benzophenone ketyl and distilled. All reagents were purchased from commercial suppliers and used without further purification unless otherwise noted. Catecholborane was purchased from Sigma-Aldrich Ltd. and purified by distillation. <sup>1</sup>H, <sup>11</sup>B, and <sup>13</sup>C{<sup>1</sup>H} NMR spectra (<sup>1</sup>H, 400 MHz; <sup>11</sup>B, 128 MHz; <sup>13</sup>C, 101 MHz) were recorded using a Bruker AVANCE 600 spectrometer. Chemical shifts are reported in  $\delta$  (ppm) and are referenced to the residual solvent signals for <sup>1</sup>H and <sup>13</sup>C, and to boron trifluoride diethyl ether complex (BF<sub>3</sub>·OEt<sub>2</sub>, 0.0 ppm) as an external reference for <sup>11</sup>B.

### Catalytic Hydroborations

A typical procedure (Table 2, entry 1) is as follows. All reactions were carried out under nitrogen atmosphere. To a stirred solution of bis(2,2,6,6-tetramethyl-3,5-heptanedionato)nickel(II) (**3**) (0.001 mmol) in benzene (0.5 mL), was added benzonitrile (20.6 mg, 0.20 mmol) at 25 °C. After the mixture was stirred for 1 min, catecholborane (52.8 mg, 0.44 mmol) was added, and then the solution was stirred at room temperature for 18 hours. PhSiMe<sub>3</sub> (13.1 mg, 0.087 mmol) as an internal standard was added to the reaction mixture, and <sup>1</sup>H NMR was measured to determine the NMR yield of PhCH<sub>2</sub>N(Bcat)<sub>2</sub> (>99%). The resulting solution was then diluted by benzene (30 mL) and filtered to remove precipitates. The filtrate was concentrated to dryness to give analytically pure PhCH<sub>2</sub>N(Bcat)<sub>2</sub> (65.9 mg, 0.19 mmol, 93%).

### Compound Characterization Data

The final product was characterized by <sup>1</sup>H, <sup>13</sup>C{<sup>1</sup>H} and <sup>11</sup>B{<sup>1</sup>H} NMR due to the instability of the hydroborated products under air. CH<sub>3</sub>CH<sub>2</sub>N(Bcat)<sub>2</sub> and PhCH<sub>2</sub>N(Bcat)<sub>2</sub> were identified by comparing their <sup>1</sup>H, <sup>11</sup>B, and <sup>13</sup>C{<sup>1</sup>H} NMR data with those previously reported.<sup>1</sup>

$CH_3CH_2(Bcat)_2$

$^1H$  NMR ( $C_6D_6$ , 25 °C): 7.03 (m, 4H, *Bcat*), 6.76 (m, 4H, *Bcat*), 3.34 (q, 2H,  $CH_2N$ ,  $J = 7.2$  Hz), 1.11 (t, 3H,  $CH_3$ ,  $J = 7.2$  Hz).  $^{11}B$  NMR ( $C_6D_6$ , 25 °C): 26.8 (bs, *Bcat*).  $^{13}C\{^1H\}$  NMR ( $C_6D_6$ , 25 °C): 148.9, 122.5, 112.3, 39.4, 17.7.

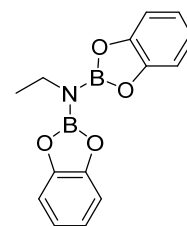

$^1H$  NMR:

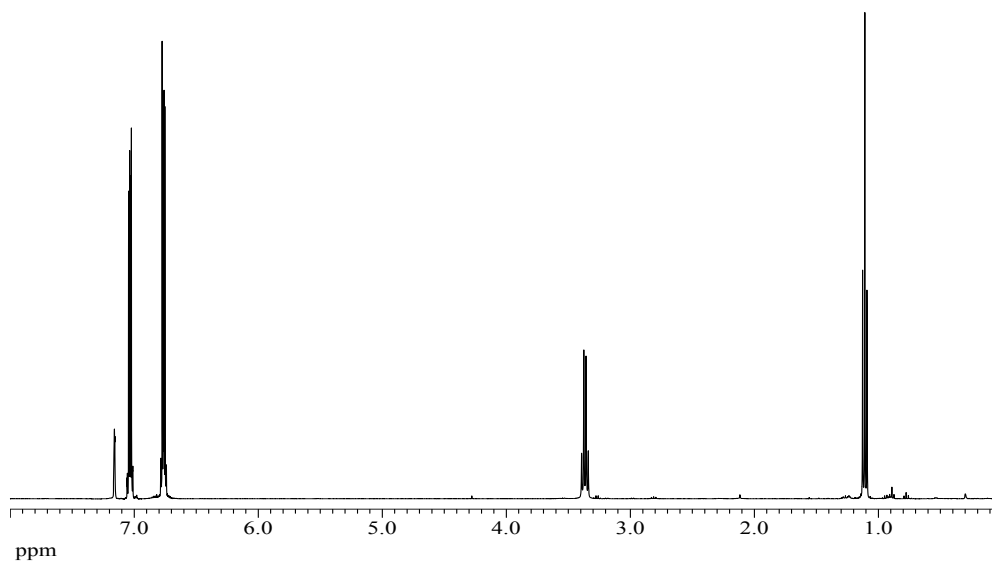

$^{13}C\{^1H\}$  NMR:

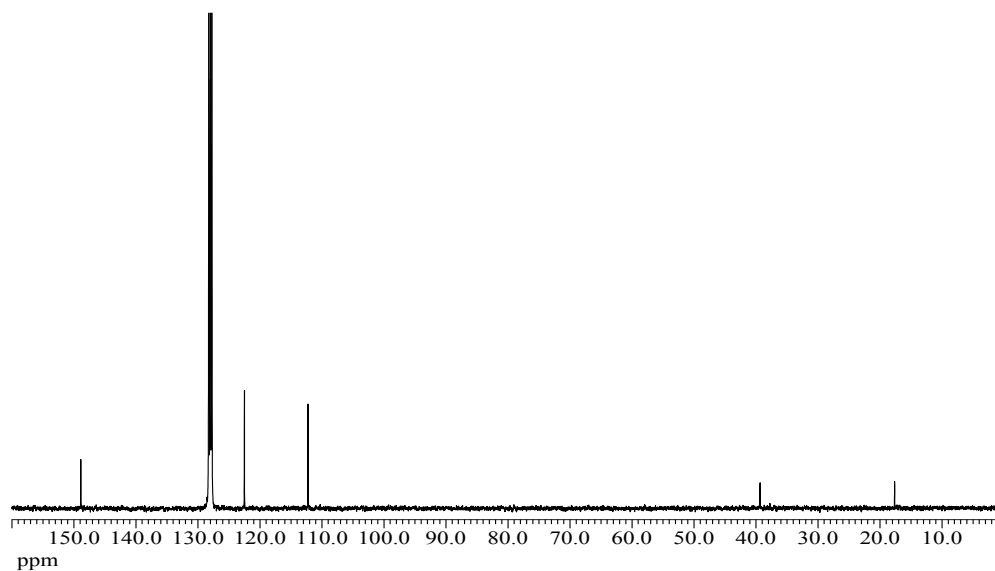

$CH_3CH_2CH_2N(Bcat)_2$

$^1H$  NMR ( $C_6D_6$ , 25 °C): 7.04 (m, 4H, *Bcat*), 6.76 (m, 4H, *Bcat*), 3.34 (t, 2H,  $CH_2N$ ,  $J = 7.6$  Hz), 1.56 (m, 2H,  $NCH_2-CH_2-CH_3$ ), 0.80 (t, 3H,  $CH_3$ ,  $J = 7.2$  Hz).  $^{11}B$  NMR ( $C_6D_6$ , 25 °C): 27.0 (bs, *Bcat*).  $^{13}C\{^1H\}$  NMR ( $C_6D_6$ , 25 °C): 148.9, 122.5, 112.3, 46.2, 25.6, 11.2.

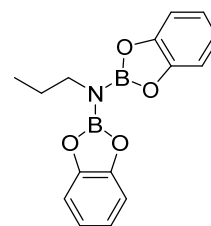

$^1H$  NMR:

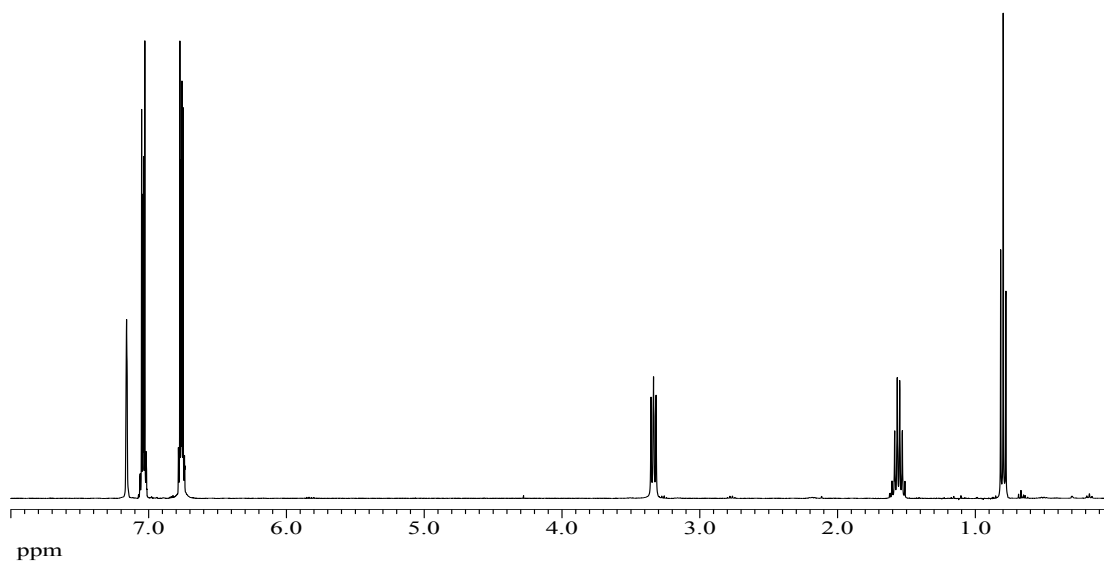

$^{13}C\{^1H\}$  NMR:

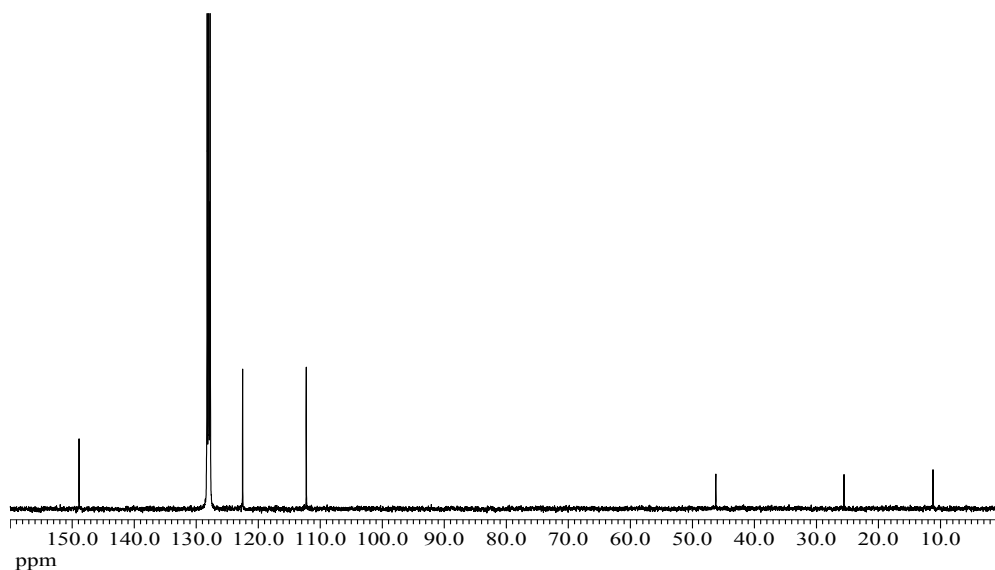

$i\text{PrCH}_2\text{N}(\text{Bcat})_2$

$^1\text{H}$  NMR ( $\text{C}_6\text{D}_6$ , 25 °C): 7.05 (m, 4H, *Bcat*), 6.76 (m, 4H, *Bcat*), 3.25 (d, 2H,  $\text{CH}_2\text{N}$ ,  $J = 7.6$  Hz), 1.90 (m, 1H,  $(\text{CH}_3)_2\text{CH}$ ), 0.84 (d, 6H,  $\text{CH}_3$ ,  $J = 6.4$  Hz).

$^{11}\text{B}$  NMR ( $\text{C}_6\text{D}_6$ , 25 °C): 26.9 (bs, *Bcat*).  $^{13}\text{C}\{^1\text{H}\}$  NMR ( $\text{C}_6\text{D}_6$ , 25 °C): 148.9, 122.6, 112.3, 51.9, 30.4, 20.0.

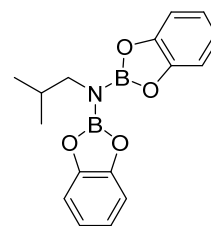

$^1\text{H}$  NMR:

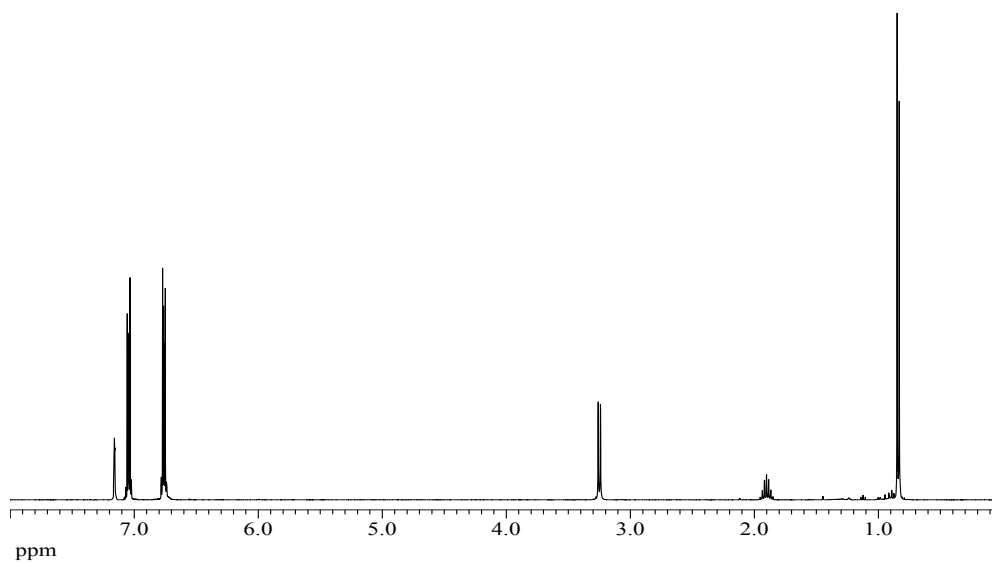

$^{13}\text{C}\{^1\text{H}\}$  NMR:

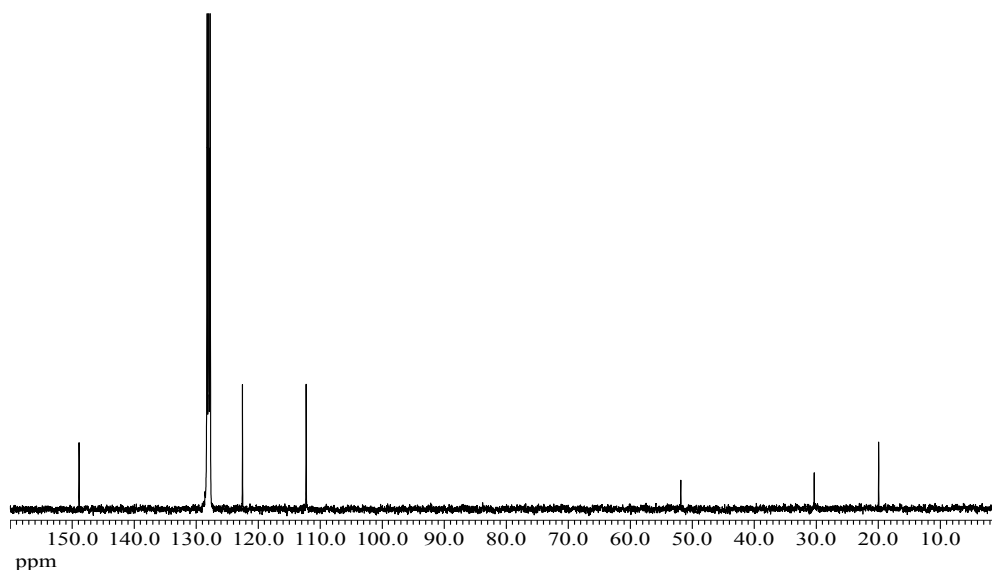

$t\text{BuCH}_2\text{N}(\text{Bcat})_2$

$^1\text{H}$  NMR ( $\text{C}_6\text{D}_6$ , 25 °C): 7.05 (m, 4H, *Bcat*), 6.77 (m, 4H, *Bcat*), 3.32 (s, 2H,  $\text{CH}_2\text{N}$ ), 0.86 (s, 9H,  $\text{CH}_3$ ).  $^{11}\text{B}$  NMR ( $\text{C}_6\text{D}_6$ , 25 °C): 27.0 (bs, *Bcat*).  $^{13}\text{C}\{^1\text{H}\}$  NMR ( $\text{C}_6\text{D}_6$ , 25 °C): 148.8, 122.6, 112.2, 55.3, 33.2, 27.4.

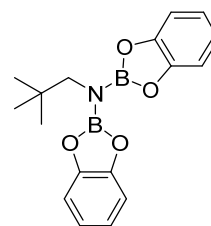

$^1\text{H}$  NMR:

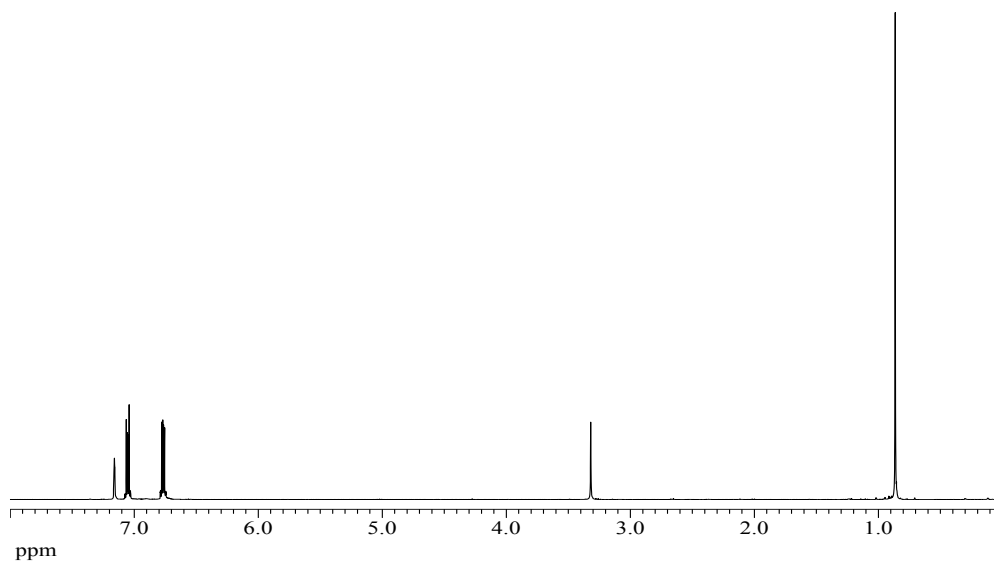

$^{13}\text{C}\{^1\text{H}\}$  NMR:

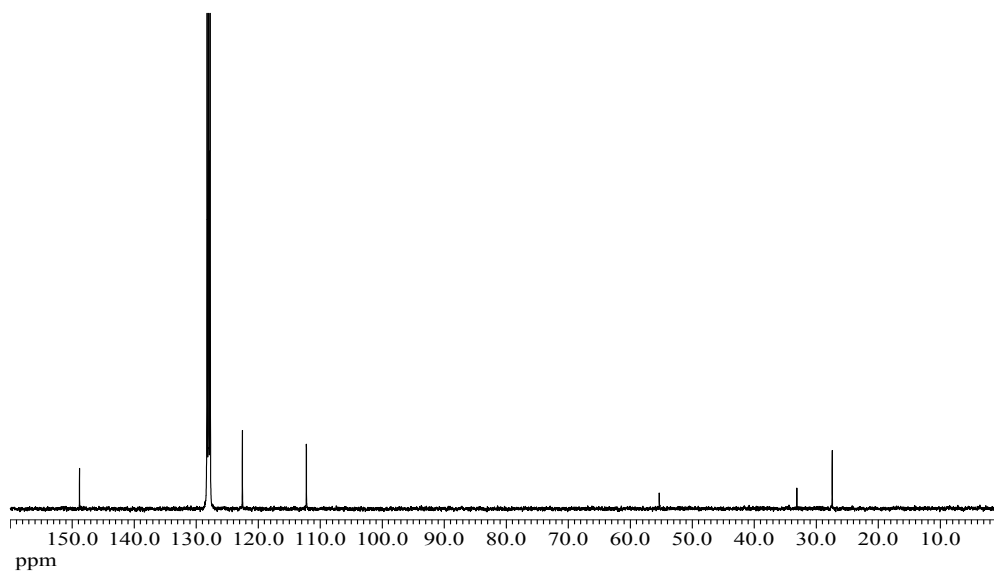

$CyCH_2N(Bcat)_2$

$^1H$  NMR ( $C_6D_6$ , 25 °C): 7.06 (m, 4H, *Bcat*), 6.76 (m, 4H, *Bcat*), 3.32 (d, 2H,  $CH_2N$ ,  $J = 7.2$  Hz), 1.63 (m, 6H, *Cy-H*), 0.99 (m, 5H, *Cy-H*).  $^{11}B$  NMR ( $C_6D_6$ , 25 °C): 26.9 (bs, *Bcat*).  $^{13}C\{^1H\}$  NMR ( $C_6D_6$ , 25 °C): 148.9, 122.55, 112.3, 50.8, 39.8, 30.9, 26.8, 26.2.

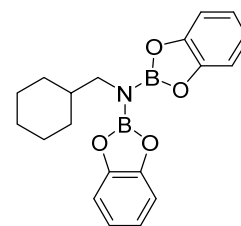

$^1H$  NMR:

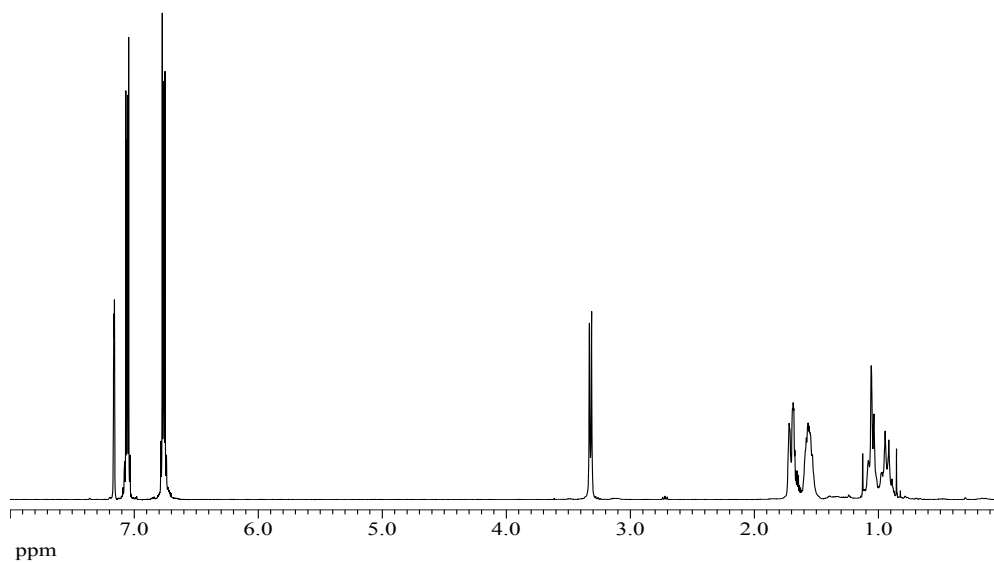

$^{13}C\{^1H\}$  NMR:

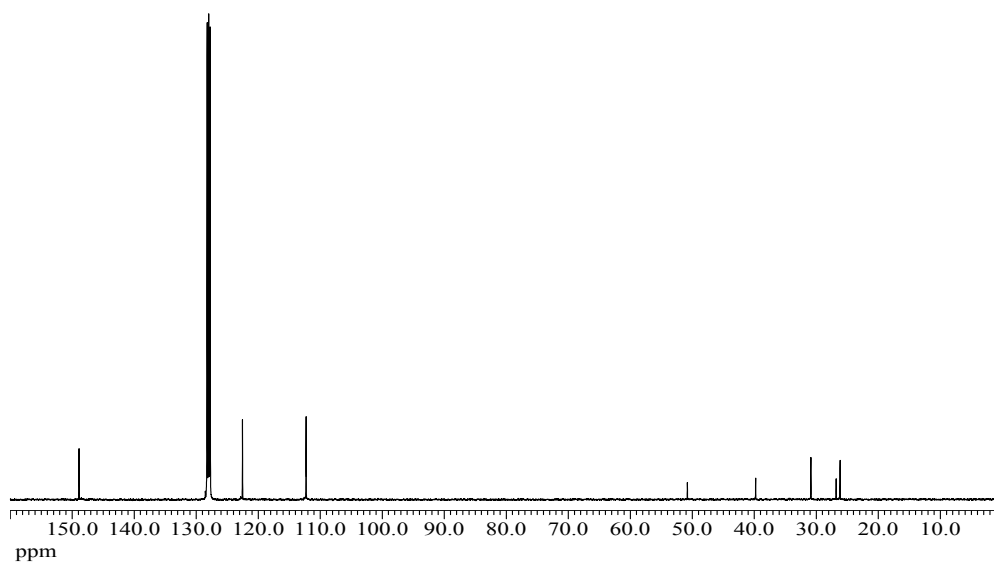

*PhCH<sub>2</sub>CH<sub>2</sub>N(Bcat)<sub>2</sub>*

<sup>1</sup>H NMR (C<sub>6</sub>D<sub>6</sub>, 25 °C): 7.15 (d, 2H, *J* = 7.2 Hz, Ar-*H*), 7.10 (t, 2H, *J* = 7.2 Hz, Ar-*H*), 7.05 (m, 4H, *Bcat*), 7.00 (t, 1H, *J* = 7.2 Hz, Ar-*H*), 6.77 (m, 4H, *Bcat*), 3.60 (t, 2H, *J* = 7.6 Hz, CH<sub>2</sub>N), 2.80 (t, 2H, *J* = 7.6 Hz, PhCH<sub>2</sub>). <sup>11</sup>B NMR (C<sub>6</sub>D<sub>6</sub>, 25 °C): 27.0 (bs, *Bcat*). <sup>13</sup>C{<sup>1</sup>H} NMR (C<sub>6</sub>D<sub>6</sub>, 25 °C): 148.8, 139.3, 129.3, 128.7, 128.5, 128.3, 122.6, 112.3, 46.2, 39.0.

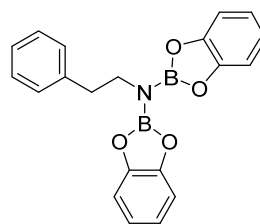

<sup>1</sup>H NMR:

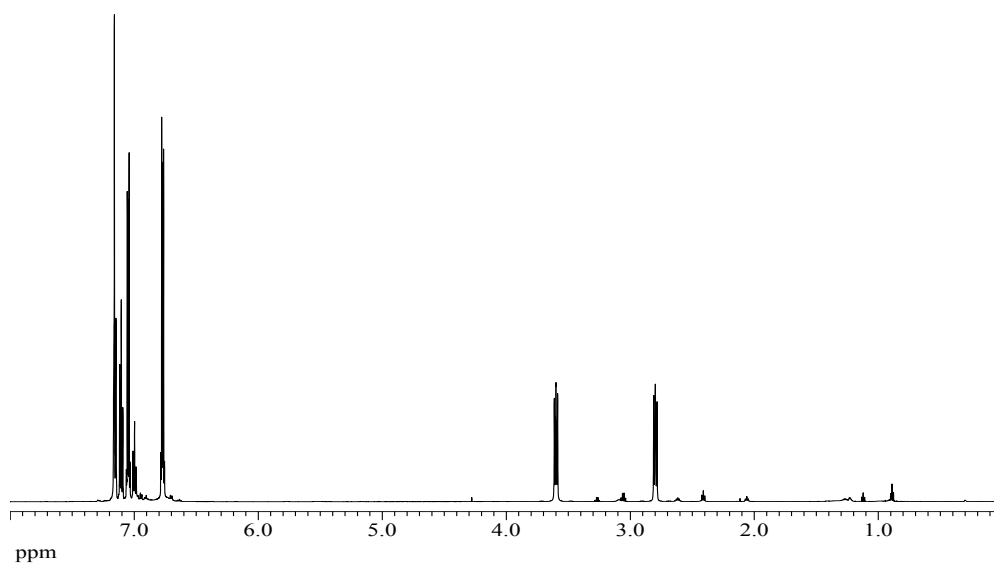

<sup>13</sup>C{<sup>1</sup>H} NMR:

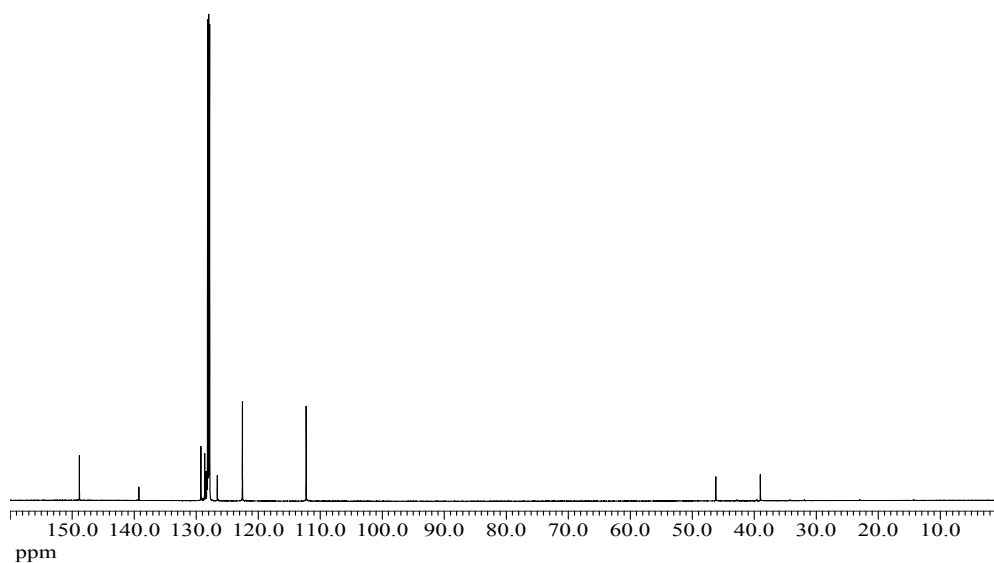

*PhCH<sub>2</sub>N(Bcat)<sub>2</sub>*

<sup>1</sup>H NMR (C<sub>6</sub>D<sub>6</sub>, 25 °C): 7.40 (d, 2H, *J* = 7.2 Hz, Ar-*H*), 7.11 (t, 2H, *J* = 7.6 Hz, Ar-*H*), 7.05 (m, 1H, Ar-*H*), 6.99 (m, 4H, *Bcat*), 6.73 (m, 4H, *Bcat*), 4.55 (s, 2H, CH<sub>2</sub>N). <sup>11</sup>B NMR (C<sub>6</sub>D<sub>6</sub>, 25 °C): 27.2 (bs, *Bcat*). <sup>13</sup>C{<sup>1</sup>H} NMR (C<sub>6</sub>D<sub>6</sub>, 25 °C): 148.8, 140.6, 139.4, 128.8, 127.4, 122.6, 112.3, 47.9.

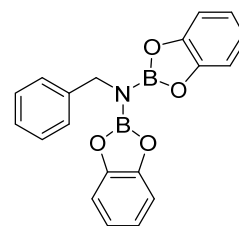

<sup>1</sup>H NMR:

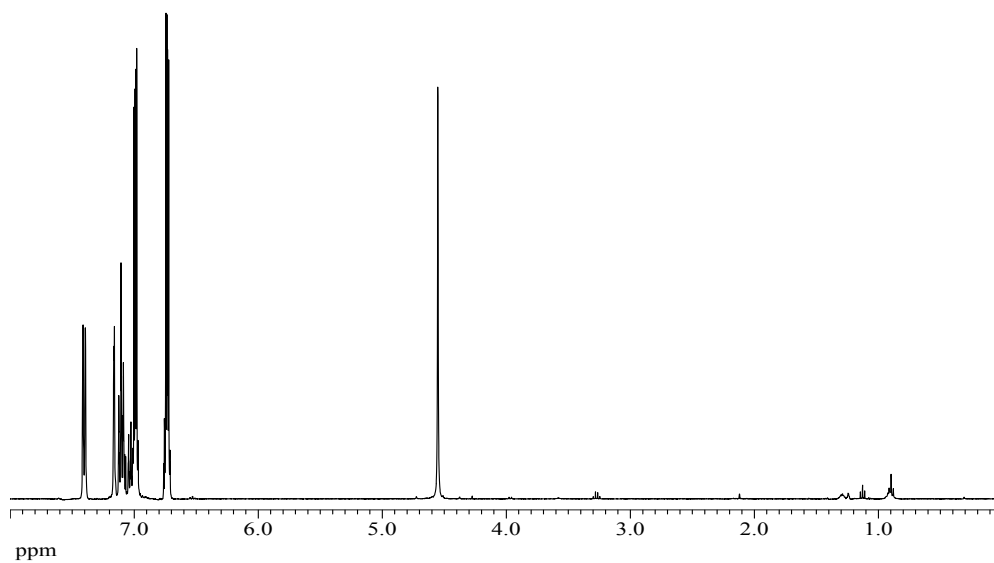

<sup>13</sup>C{<sup>1</sup>H} NMR:

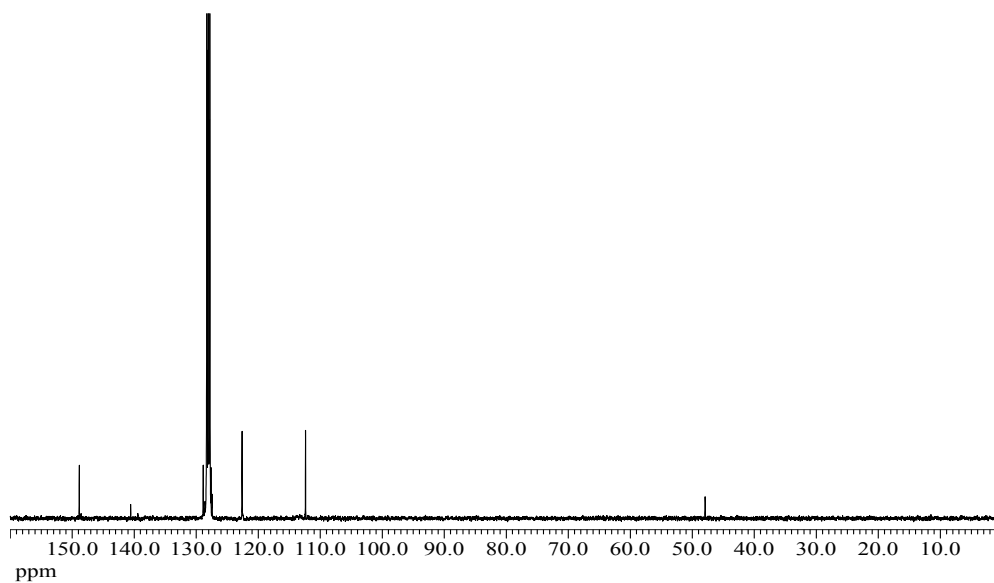

(*o*-tolyl)CH<sub>2</sub>N(Bcat)<sub>2</sub>

<sup>1</sup>H NMR (C<sub>6</sub>D<sub>6</sub>, 25 °C): δ 7.28 (d, 2H, *J* = 8.0 Hz, Ar-*H*), 6.98 (m, 6H, Ar-*H* and Bcat), 6.88 (d, 1H, *J* = 7.6 Hz, Ar-*H*), 6.72 (m, 4H, Bcat), 4.57 (s, 2H, CH<sub>2</sub>N), 2.15 (s, 3H, CH<sub>3</sub>). <sup>11</sup>B NMR (C<sub>6</sub>D<sub>6</sub>, 25 °C): δ 27.1 (bs, Bcat). <sup>13</sup>C{<sup>1</sup>H} NMR (C<sub>6</sub>D<sub>6</sub>, 25 °C): δ 148.8, 138.0, 135.1, 130.4, 128.3, 126.9, 126.7, 125.1, 122.6, 112.4, 45.38, 19.0.

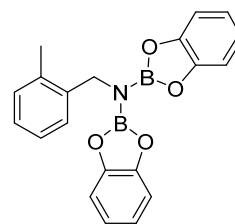

<sup>1</sup>H NMR:

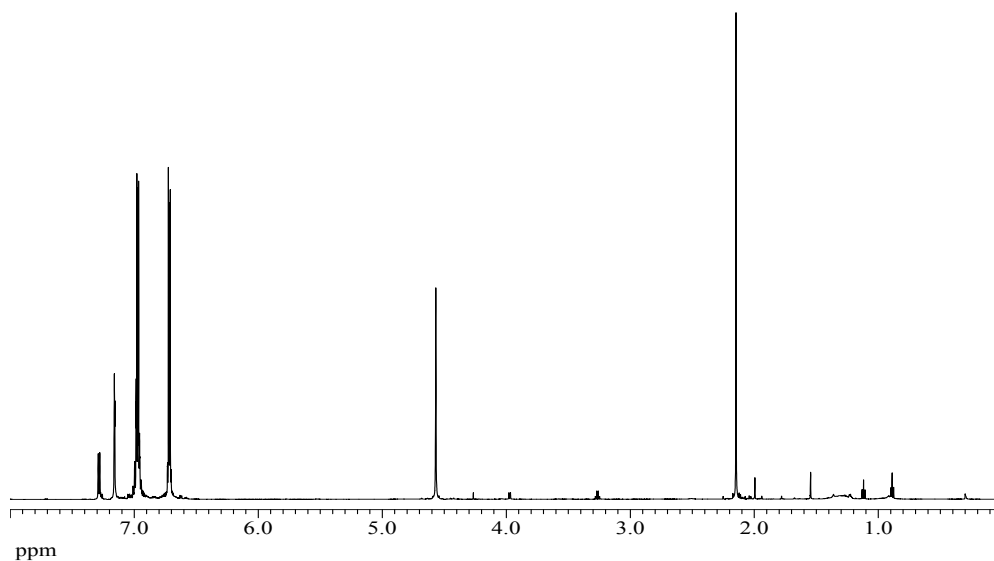

<sup>13</sup>C{<sup>1</sup>H} NMR:

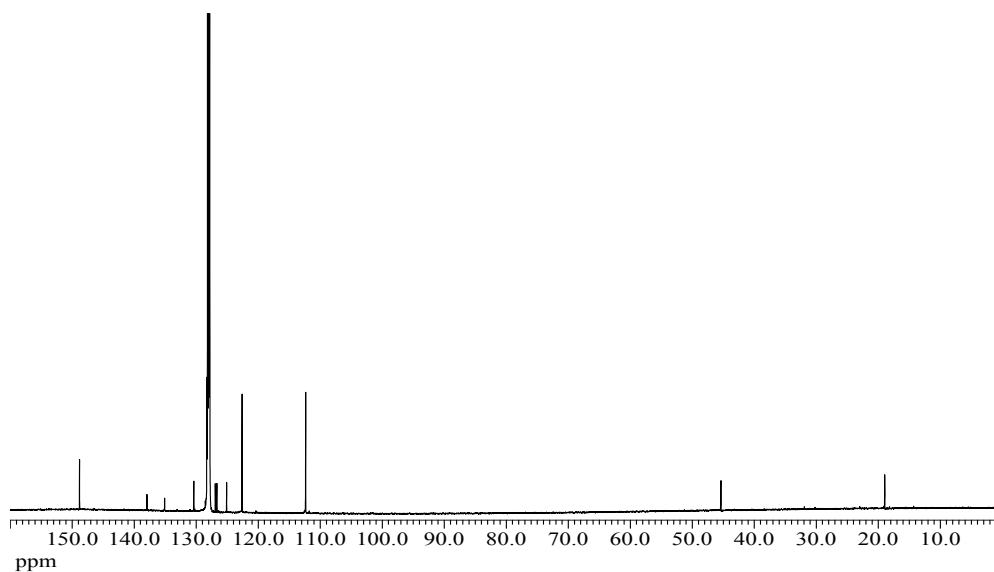

*(m-tolyl)CH<sub>2</sub>N(Bcat)<sub>2</sub>*

<sup>1</sup>H NMR (C<sub>6</sub>D<sub>6</sub>, 25 °C): δ 7.27 (m, 2H, Ar-*H*), 7.11 (m, 1H, Ar-*H*), 6.99 (m, 4H, Bcat), 6.88 (d, 1H, *J* = 7.6 Hz, Ar-*H*), 6.72 (m, 4H, Bcat), 4.59 (s, 2H, CH<sub>2</sub>N), 2.05 (s, 3H, CH<sub>3</sub>). <sup>11</sup>B NMR (C<sub>6</sub>D<sub>6</sub>, 25 °C): δ 27.0 (bs, Bcat). <sup>13</sup>C{<sup>1</sup>H} NMR (C<sub>6</sub>D<sub>6</sub>, 25 °C): δ 148.8, 140.5, 138.2, 128.9, 127.9, 124.6, 122.6, 112.3, 47.9, 21.3.

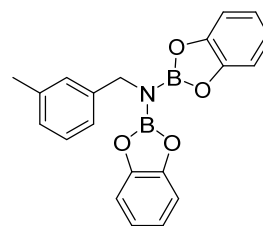

<sup>1</sup>H NMR:

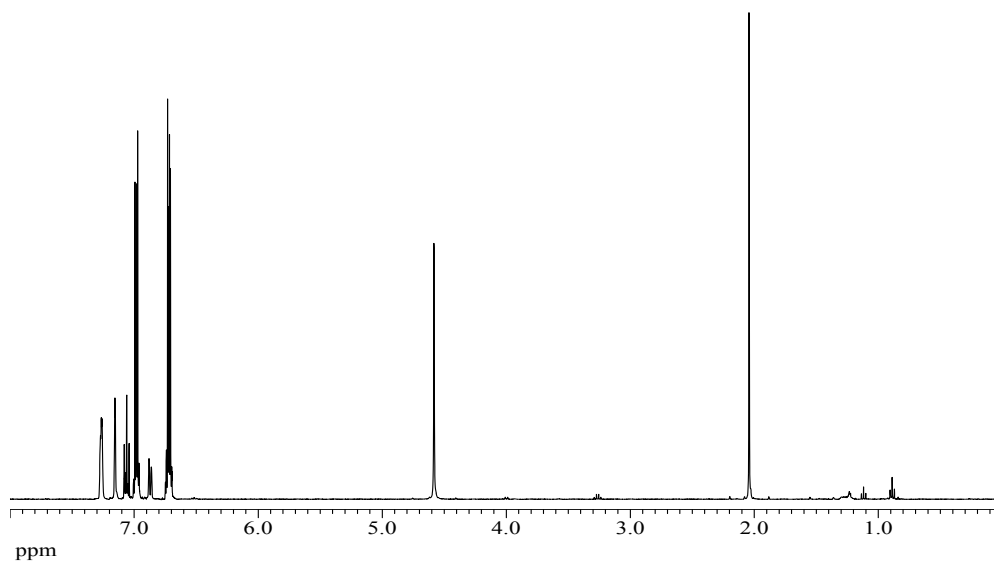

<sup>13</sup>C{<sup>1</sup>H} NMR:

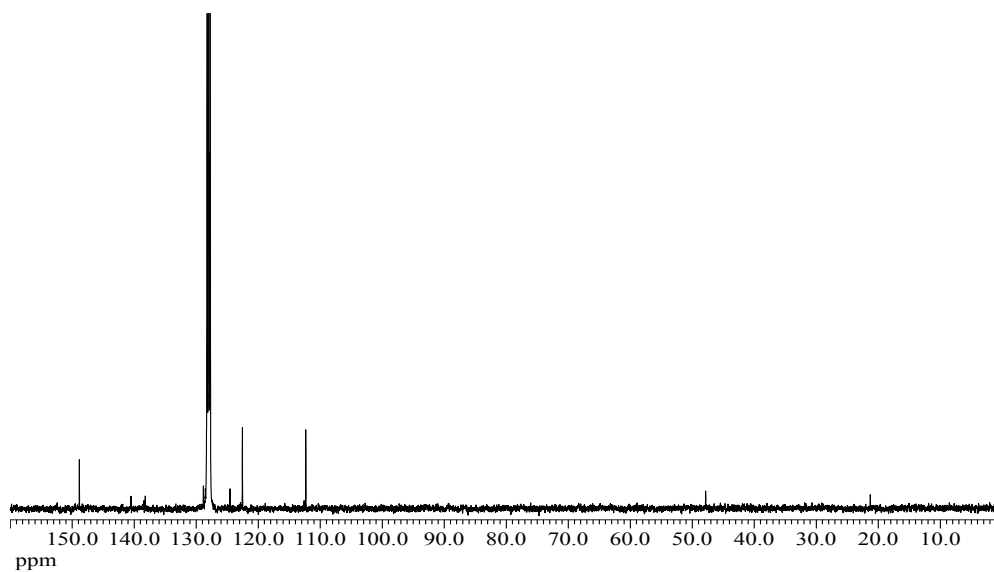

*(p-tolyl)CH<sub>2</sub>N(Bcat)<sub>2</sub>*

<sup>1</sup>H NMR (C<sub>6</sub>D<sub>6</sub>, 25 °C): 7.37 (d, 2H, *J* = 8.0 Hz, Ar-*H*), 7.00 (m, 4H, Bcat), 6.95 (d, 2H, *J* = 8.0 Hz, Ar-*H*), 6.72 (m, 4H, Bcat), 4.57 (s, 2H, CH<sub>2</sub>N), 2.06 (s, 3H, CH<sub>3</sub>). <sup>11</sup>B NMR (C<sub>6</sub>D<sub>6</sub>, 25 °C): 27.1 (bs, Bcat). <sup>13</sup>C{<sup>1</sup>H} NMR (C<sub>6</sub>D<sub>6</sub>, 25 °C): 148.9, 137.7, 136.8, 129.5, 122.5, 112.3, 47.7, 21.0.

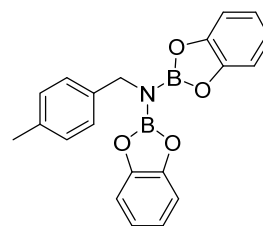

<sup>1</sup>H NMR:

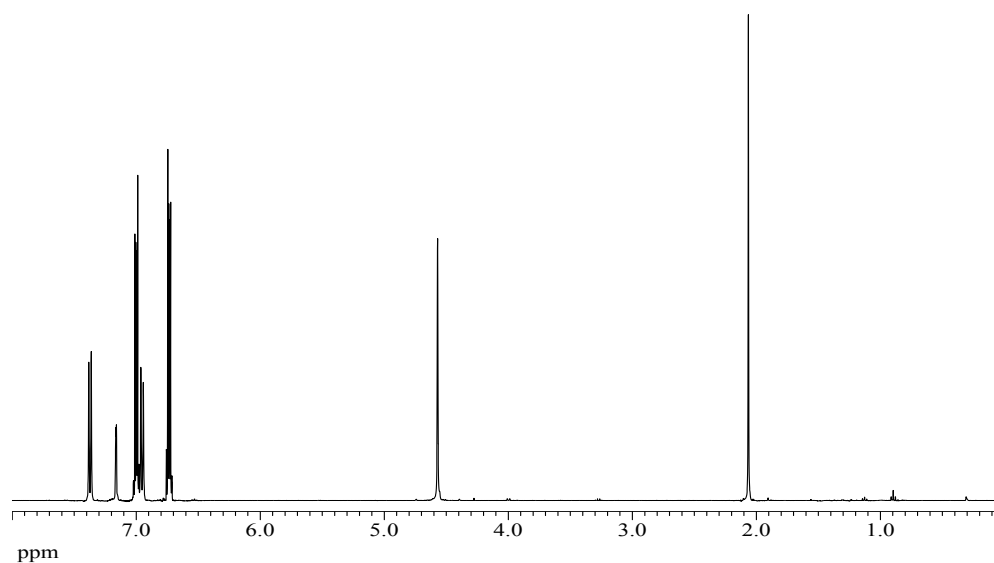

<sup>13</sup>C{<sup>1</sup>H} NMR:

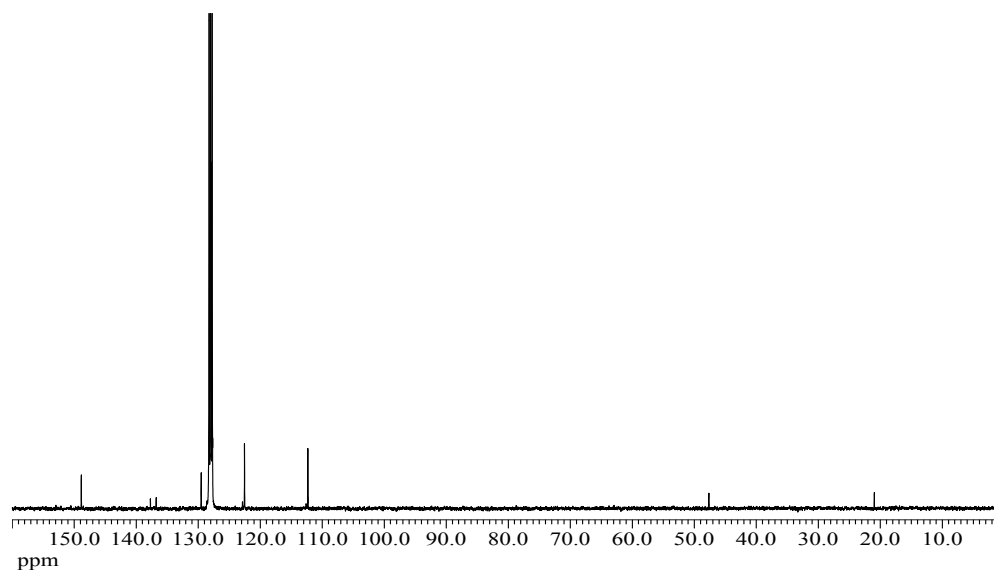

*(p-MeOC<sub>6</sub>H<sub>4</sub>)CH<sub>2</sub>N(Bcat)<sub>2</sub>*

<sup>1</sup>H NMR (C<sub>6</sub>D<sub>6</sub>, 25 °C): 7.38 (d, 2H, *J* = 8.8 Hz, Ar-*H*), 7.02 (m, 4H, Bcat), 6.73 (m, 6H, Ar-*H* and Bcat), 4.54 (s, 2H, CH<sub>2</sub>N), 3.26 (s, 3H, OCH<sub>3</sub>). <sup>11</sup>B NMR (C<sub>6</sub>D<sub>6</sub>, 25 °C): 27.2 (bs, Bcat). <sup>13</sup>C{<sup>1</sup>H} NMR (C<sub>6</sub>D<sub>6</sub>, 25 °C): 159.4, 148.9, 132.8, 136.8, 129.1, 122.6, 114.2, 112.3, 54.8, 47.4.

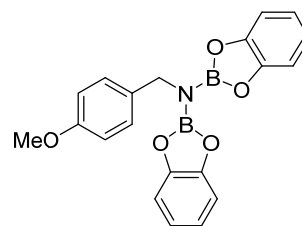

<sup>1</sup>H NMR:

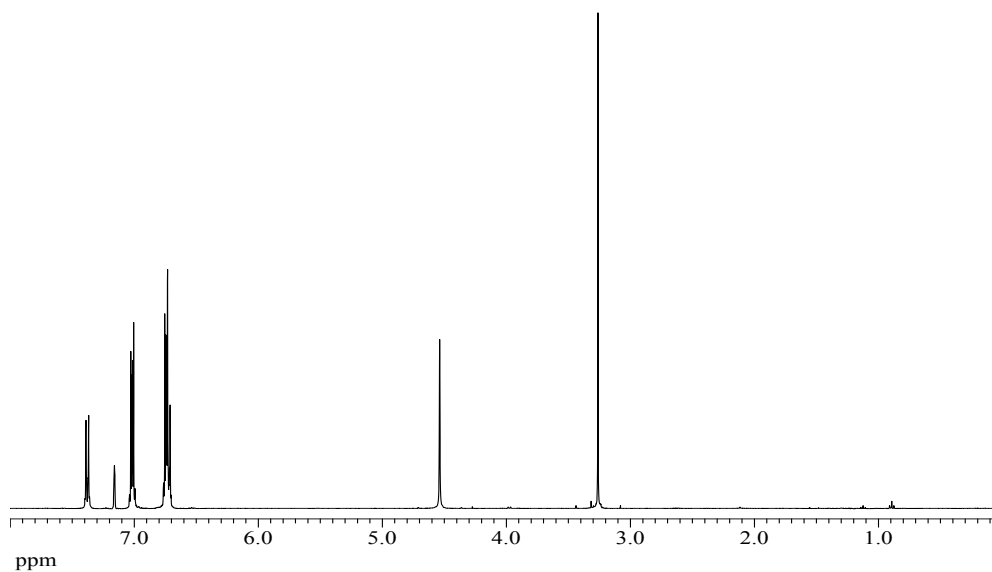

<sup>13</sup>C{<sup>1</sup>H} NMR:

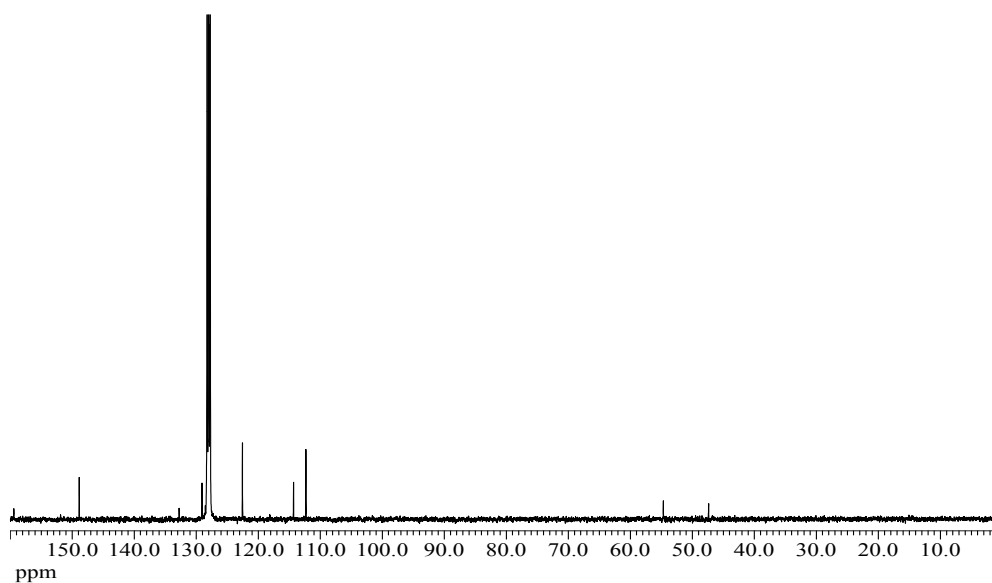

$(p\text{-F}_3\text{CC}_6\text{H}_4)\text{CH}_2\text{N}(\text{Bcat})_2$

$^1\text{H}$  NMR ( $\text{C}_6\text{D}_6$ , 25 °C): 7.24 (d, 2H,  $J = 8.0$  Hz, Ar- $H$ ), 7.11 (d, 2H,  $J = 8.0$  Hz, Ar- $H$ ), 7.01 (m, 4H, Bcat), 6.75 (m, 4H, Bcat), 4.39 (s, 2H,  $\text{CH}_2\text{N}$ ).  $^{11}\text{B}$  NMR ( $\text{C}_6\text{D}_6$ , 25 °C): 26.8 (bs, Bcat).  $^{13}\text{C}\{^1\text{H}\}$  NMR ( $\text{C}_6\text{D}_6$ , 25 °C): 148.7, 144.2, 136.8, 129.5, 125.8, 127.5, 122.8, 112.4, 47.3.

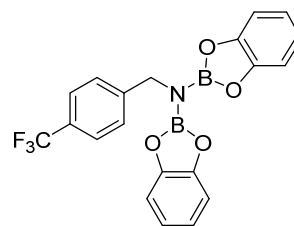

$^1\text{H}$  NMR:

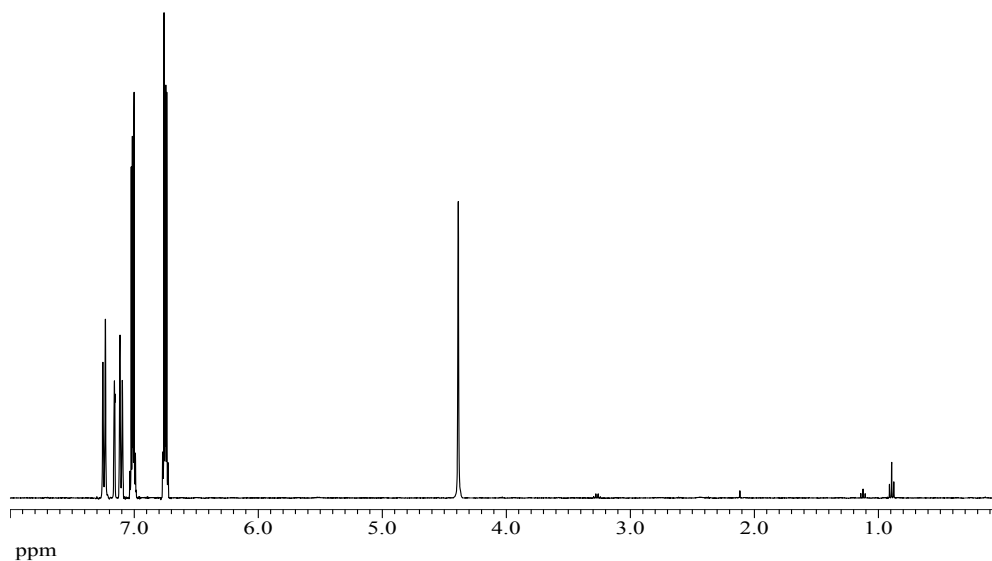

$^{13}\text{C}\{^1\text{H}\}$  NMR:

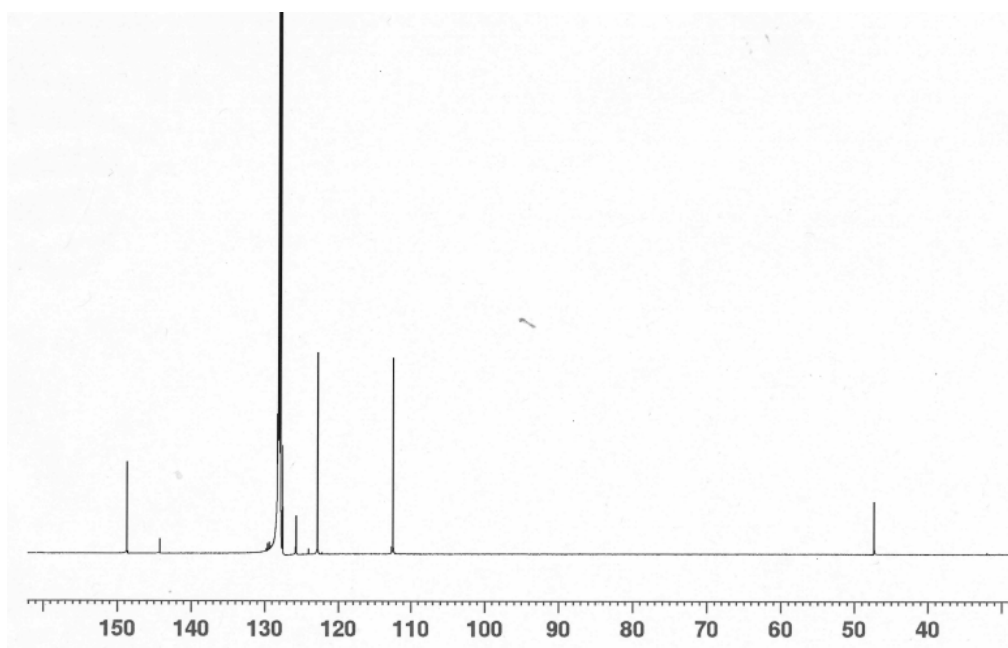

*(m-ClC<sub>6</sub>H<sub>4</sub>)CH<sub>2</sub>N(Bcat)<sub>2</sub>*

<sup>1</sup>H NMR (C<sub>6</sub>D<sub>6</sub>, 25 °C): 7.47 (s, 1H, Ar-*H*), 7.10 (d, 1H, *J* = 8.0 Hz, Ar-*H*), 6.98 (m, 5H, Ar-*H* and Bcat), 6.74 (m, 5H, Ar-*H* and Bcat), 4.35 (s, 2H, CH<sub>2</sub>N). <sup>11</sup>B NMR (C<sub>6</sub>D<sub>6</sub>, 25 °C): 26.9 (bs, Bcat). <sup>13</sup>C {<sup>1</sup>H} NMR (C<sub>6</sub>D<sub>6</sub>, 25 °C): 148.7, 142.6, 134.7, 130.2, 128.3, 125.5, 122.7, 112.4, 47.3.

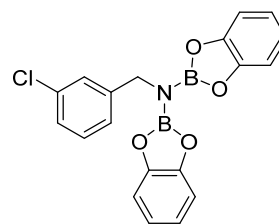

<sup>1</sup>H NMR:

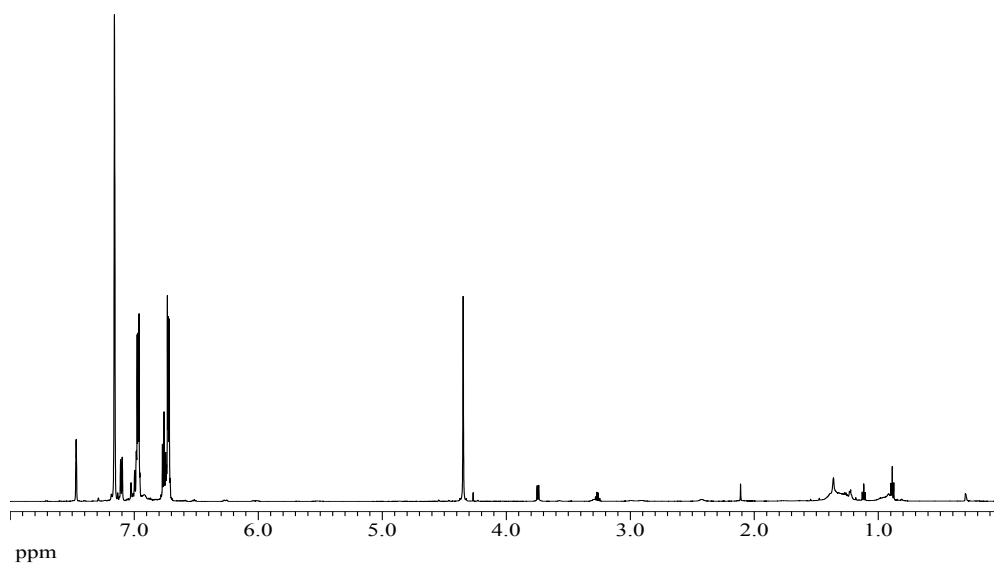

<sup>13</sup>C {<sup>1</sup>H} NMR:

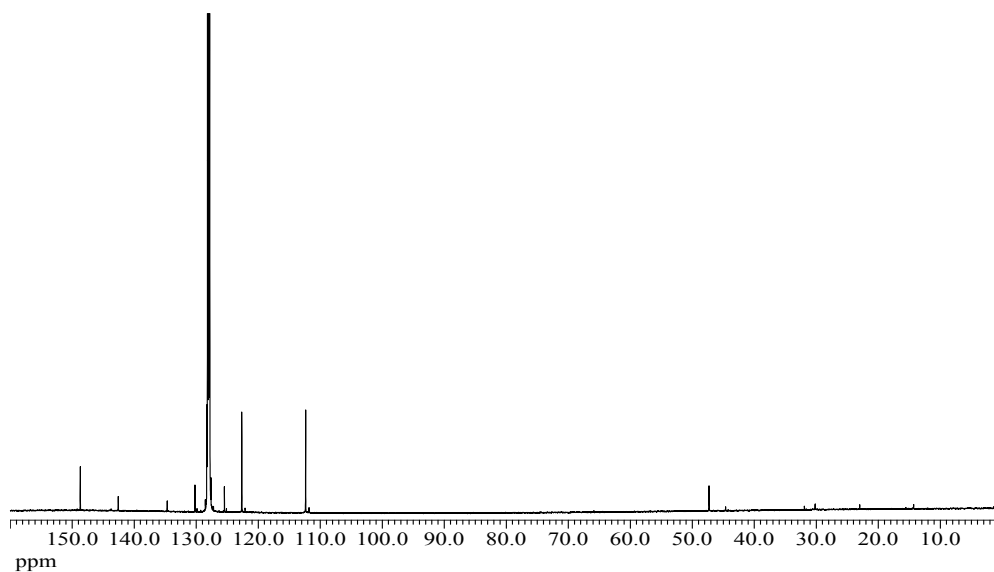

*(p-ClC<sub>6</sub>H<sub>4</sub>)CH<sub>2</sub>N(Bcat)<sub>2</sub>*

<sup>1</sup>H NMR (C<sub>6</sub>D<sub>6</sub>, 25 °C): 7.04 (m, 8H, Ar-*H* and *Bcat*), 6.74 (m, 4H, *Bcat*), 4.35 (s, 2H, CH<sub>2</sub>N). <sup>11</sup>B NMR (C<sub>6</sub>D<sub>6</sub>, 25 °C): 26.9 (bs, *Bcat*).

<sup>13</sup>C{<sup>1</sup>H} NMR (C<sub>6</sub>D<sub>6</sub>, 25 °C): 148.7, 138.9, 133.2, 129.0, 128.3, 122.7, 112.4, 47.1.

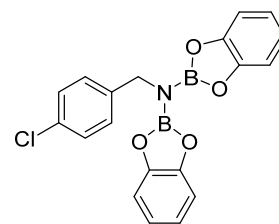

<sup>1</sup>H NMR:

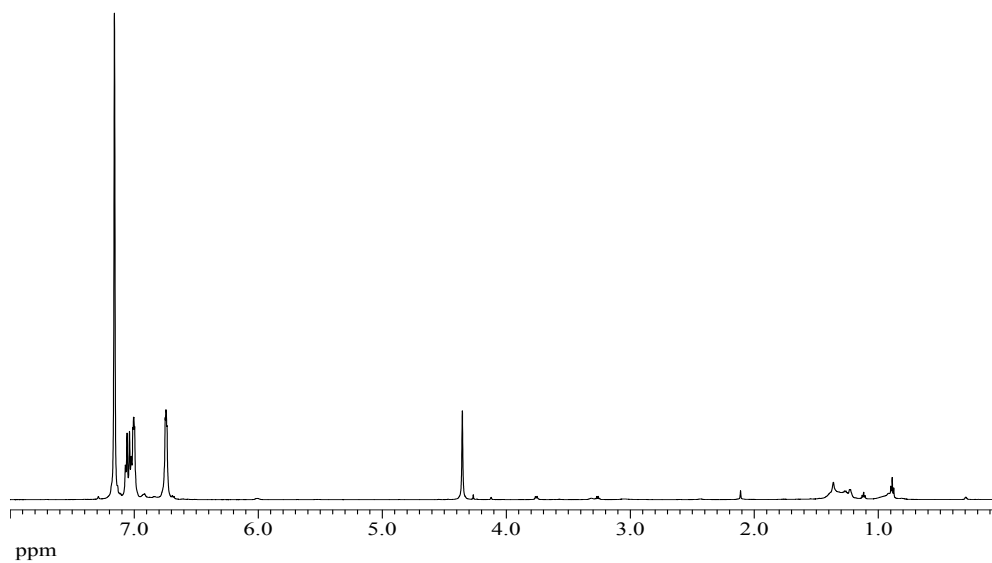

<sup>13</sup>C{<sup>1</sup>H} NMR:

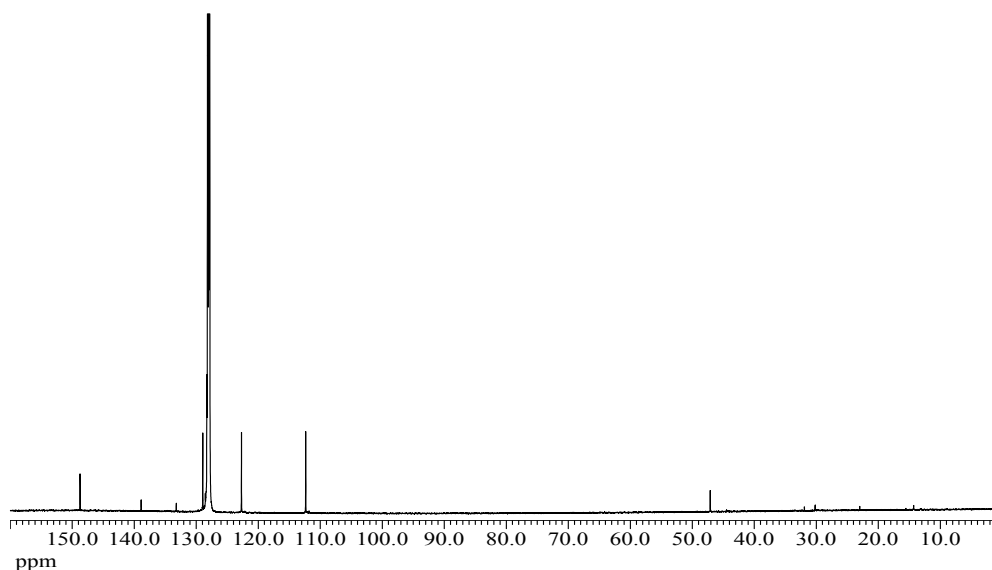

(2-furyl)CH<sub>2</sub>N(Bcat)<sub>2</sub>

<sup>1</sup>H NMR (C<sub>6</sub>D<sub>6</sub>, 25 °C): 7.00 (m, 5H, furyl-*H* and Bcat), 6.73 (m, 4H, Bcat), 6.15 (d, 1H, *J* = 3.2 Hz, furyl-*H*), 5.98 (m, 1H, furyl-*H*), 4.50 (s, 2H, CH<sub>2</sub>N).

<sup>11</sup>B NMR (C<sub>6</sub>D<sub>6</sub>, 25 °C): 27.0 (bs, Bcat). <sup>13</sup>C{<sup>1</sup>H} NMR (C<sub>6</sub>D<sub>6</sub>, 25 °C): 159.9, 148.8, 142.2, 122.6, 112.3, 110.6, 107.2, 41.0.

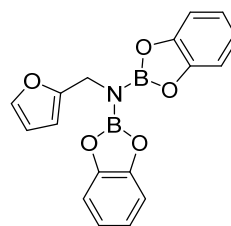

<sup>1</sup>H NMR:

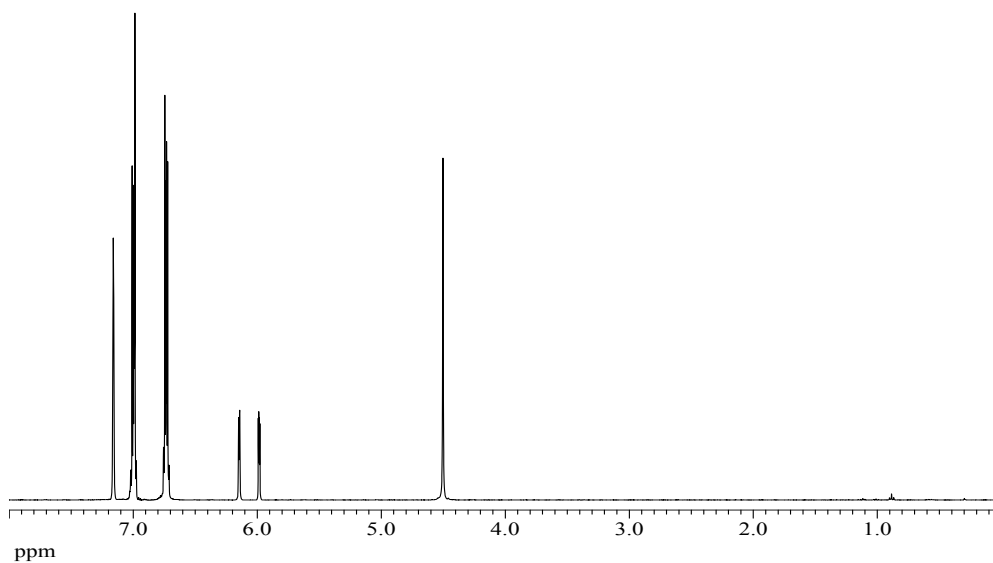

<sup>13</sup>C{<sup>1</sup>H} NMR:

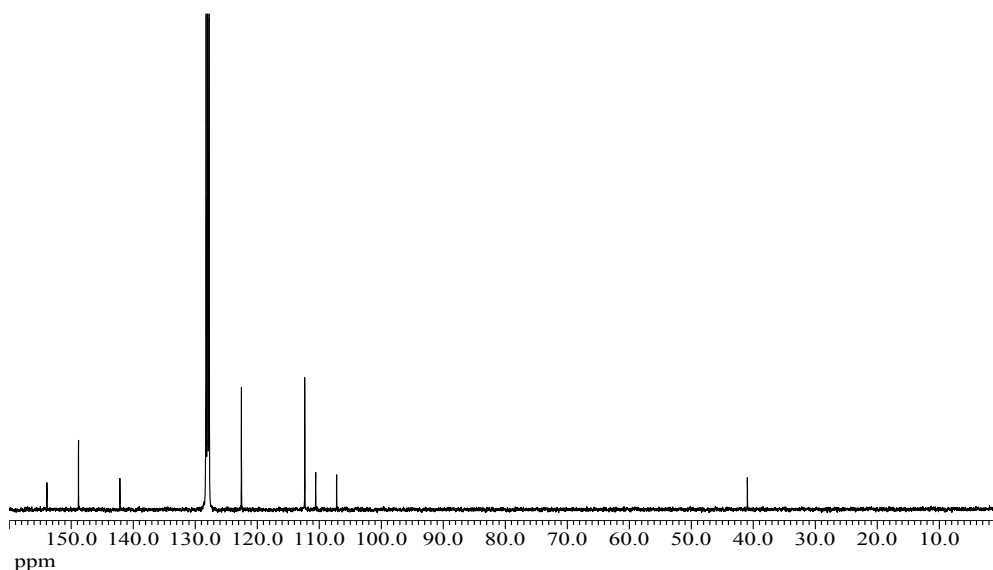

(2-thienyl)CH<sub>2</sub>N(Bcat)<sub>2</sub>

<sup>1</sup>H NMR (C<sub>6</sub>D<sub>6</sub>, 25 °C): 7.00 (m, 4H, Bcat), 6.74 (m, 6H, thienyl-*H* and Bcat), 6.65 (m, 1H, thienyl-*H*), 4.63 (s, 2H, CH<sub>2</sub>N). <sup>11</sup>B NMR (C<sub>6</sub>D<sub>6</sub>, 25 °C): 26.8 (bs, Bcat). <sup>13</sup>C{<sup>1</sup>H} NMR (C<sub>6</sub>D<sub>6</sub>, 25 °C): 148.8, 143.6, 127.0, 126.0, 125.0, 122.6, 112.4, 42.7.

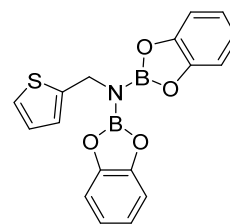

<sup>1</sup>H NMR:

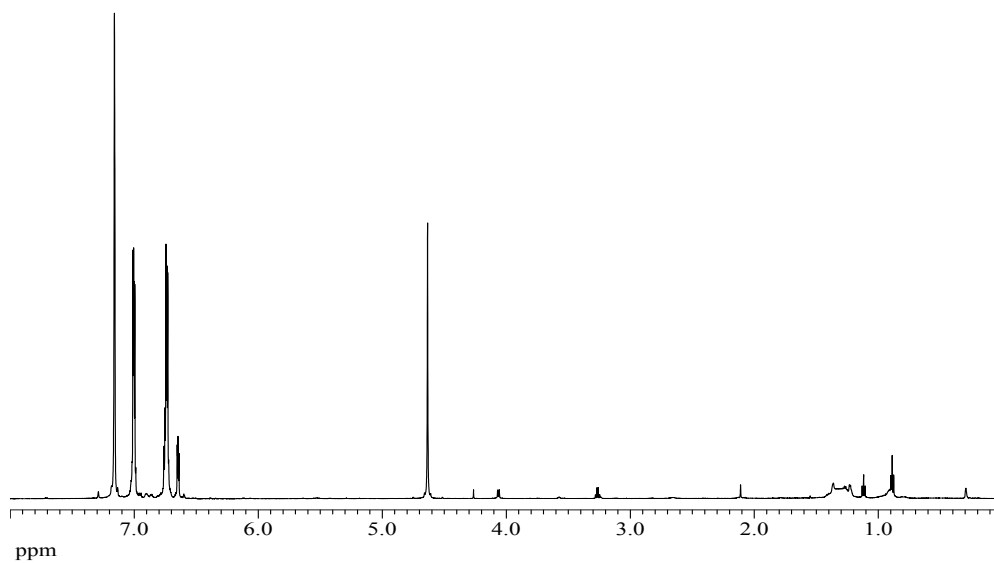

<sup>13</sup>C{<sup>1</sup>H} NMR:

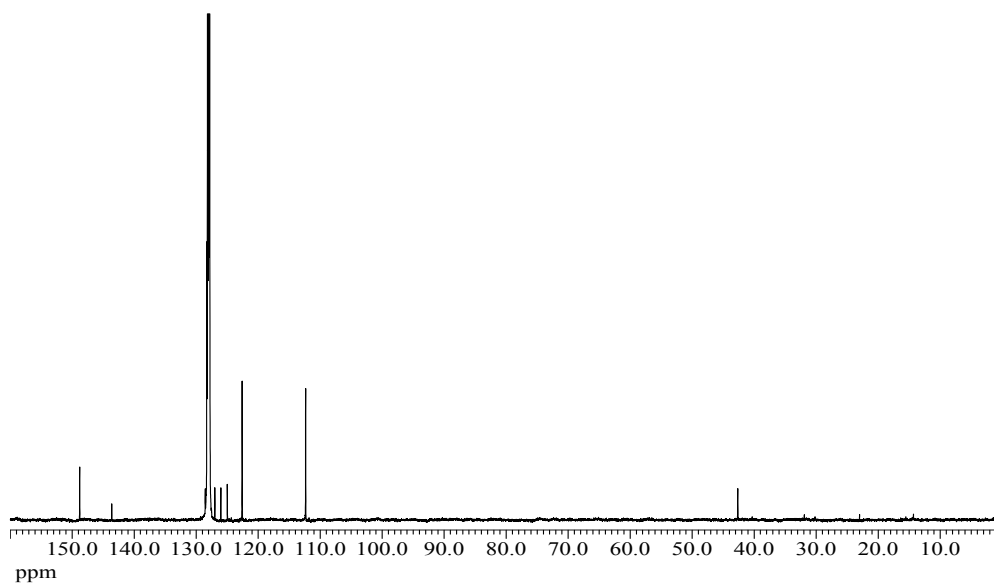

**Reaction of 3 with HBcat.** A J-young NMR tube was charged with a C<sub>6</sub>D<sub>6</sub> solution (0.4 mL) of **3** (5.0 mg, 0.012 mmol) and HBcat (5.5 mg, 0.046 mmol). After 15 min at room temperature, formation of black precipitate was observed. Formation of [tBuCOCHC(tBu)O-κO,κO']Bcat was supported by both <sup>1</sup>H and <sup>11</sup>B{<sup>1</sup>H} NMR although all the signals appeared as significantly broad signals due to the existence of paramagnetic nickel species. In addition, formation of several unidentified products, which exhibit broad signals as δ 28.9, 23.3, 18.7 ppm in the <sup>11</sup>B NMR spectrum, was also confirmed. After filtration, slow evaporation of the filtrate afforded single crystals of [tBuCOCHC(tBu)O-κO,κO']Bcat.

[tBuCOCHC(tBu)O-κO,κO']Bcat: <sup>1</sup>H NMR (C<sub>6</sub>D<sub>6</sub>, 25 °C): 7.11 (dd, 2H, *J* = 5.4, 3.6 Hz, *Bcat*), 6.84 (dd, 2H, *J* = 5.4, 3.6 Hz, *Bcat*), 5.82 (s, 1H, CH), 0.84 (s, 18H, *t*Bu). <sup>11</sup>B NMR (C<sub>6</sub>D<sub>6</sub>, 25 °C): 9.7 (bs, *Bcat*). <sup>13</sup>C{<sup>1</sup>H} NMR (C<sub>6</sub>D<sub>6</sub>, 25 °C): 201.3, 151.9, 120.1, 110.2, 92.9, 39.5, 26.9.

**Single-crystal X-ray diffraction studies.** The single crystal X-ray diffraction measurements of [tBuCOCHC(tBu)O-κO,κO']Bcat was performed under a cold nitrogen stream on a Rigaku XtaLAB P200 diffractometer with a Pilatus 200K detector using multi-layer mirror monochromated Mo Kα radiation. The determination of crystal systems and unit cell parameters and data processing were performed with the *CrystalClear* program package. The data sets were corrected for Lorentz and polarization effects and absorption. The structure was solved by direct methods using SIR97 program,<sup>2</sup> and refined by full-matrix least squares calculations on *F*<sup>2</sup> for all reflections (SHELXL-97)<sup>3</sup>. The structure was not fully refined due to the bad quality of the crystal and the final R values remain 0.1208 (*R*<sub>1</sub>) and 0.2771 (*wR*<sub>2</sub>).

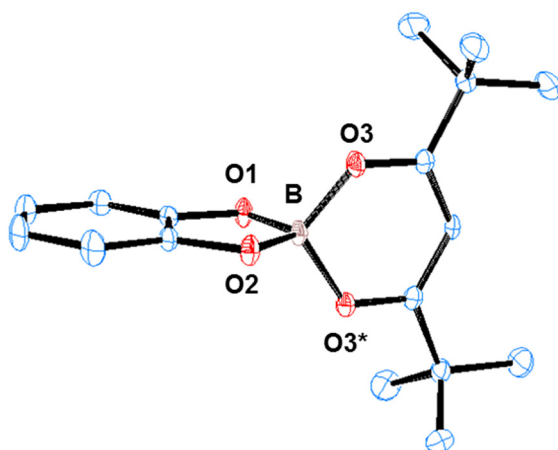

**Figure 1.** Molecular structure of [tBuCOCHC(tBu)O-κO,κO']Bcat with 50% probability ellipsoids. Hydrogen atoms are omitted for clarity. Selected bond distances (Å) and angles (deg): B–O1 1.463(3), B–O2 1.452(3), B–O3 1.490(2), O1–B–O2 107.1(2), O3–B–O3\* 108.9(2).

**Table S1.** Crystal data and details of the crystal structure determination for *t*BuCOCHC(*t*Bu)OBcat.

|                            |                                                  |                                                      |                |
|----------------------------|--------------------------------------------------|------------------------------------------------------|----------------|
| formula                    | C <sub>17</sub> H <sub>23</sub> O <sub>4</sub> B | Z                                                    | 4              |
| fw                         | 302.17                                           | <i>D</i> <sub>calcd</sub> (g/cm <sup>3</sup> )       | 1.200          |
| T (K)                      | 93(2)                                            | <i>R</i> 1, <i>wR</i> 2 [ <i>I</i> > 2σ( <i>I</i> )] | 0.1208, 0.2771 |
| cryst system               | Orthorhombic                                     | <i>R</i> 1, <i>wR</i> 2 (all data)                   | 0.1386, 0.2945 |
| space group                | <i>P</i> bnm (#62)                               | GOF                                                  | 1.371          |
| <i>a</i> (Å)               | 9.246(3)                                         |                                                      |                |
| <i>b</i> (Å)               | 12.853(4)                                        |                                                      |                |
| <i>c</i> (Å)               | 14.074(4)                                        |                                                      |                |
| α (deg)                    | 90                                               |                                                      |                |
| β (deg)                    | 90                                               |                                                      |                |
| γ (deg)                    | 90                                               |                                                      |                |
| <i>V</i> (Å <sup>3</sup> ) | 1672.5(9)                                        |                                                      |                |

## References

- 1) A. Y. Khalimon, P. Farha, L. G. Kuzmina and G. I. Nikonov, *Chem. Commun.*, **2012**, 48, 455.
- 2) Altomare, A.; Burla, M. C.; Camalli, M.; Cascarano, G.; Giacovazzo, C.; Guagliardi, A.; Moliterni, A. G. G.; Polidori G.; Spagna, R. *J. Appl. Cryst.* **1999**, 32, 115.
- 3) Sheldrick, G. M. *Acta Cryst.* **2008**, A64, 112.
